1 **Floral signals evolve in a predictable way under artificial and pollinator selection**  
2 **in *Brassica rapa* using a G-matrix**

3 Pengjuan Zu<sup>1,2\*</sup>, Florian P. Schiestl<sup>1</sup>, Daniel Gervasi<sup>1</sup>, Xin Li<sup>3</sup>, Daniel Runcie<sup>3</sup>,

4 Frédéric Guillaume<sup>4</sup>

5 <sup>1</sup>Department of Systematic and Evolutionary Botany, University of Zürich,

6 Zollikerstrasse 107, CH-8008 Zürich, Switzerland

7 <sup>2</sup>Department of Civil and Environmental Engineering, Massachusetts Institute of

8 Technology, 77 Massachusetts Avenue, 02139 Cambridge, MA, USA

9 <sup>3</sup>Department of Plant Sciences, University of California Davis, One Shields Avenue,

10 Davis, CA 95616, USA

11 <sup>4</sup>Department of Evolutionary Biology and Environmental Studies, University of

12 Zürich, Winterthurerstrasse 190, CH-8057 Zürich, Switzerland

13 \*author for correspondence

14 [pzu@mit.edu](mailto:pzu@mit.edu)

15 **Abstract**

16 **Background**

17 Angiosperms employ an astonishing variety of visual and olfactory floral signals that  
18 are generally thought to evolve under natural selection. Mathematical tools for  
19 predicting multiple traits have been developed for decades and have advanced our  
20 understanding of evolution in various biological systems. Nevertheless, very few  
21 studies have yet attempted to predict the evolutionary trajectories of floral traits,  
22 particularly when considering a comprehensive set of genetically correlated floral  
23 traits.

24 **Results**

25 We used data from an artificial and a pollinator (bumblebee, hoverfly) selection  
26 experiment with fast cycling *Brassica rapa* plants to predict evolutionary changes of  
27 12 floral volatiles and 4 morphological floral traits in response to selection. Using the  
28 observed selection gradients and the genetic variance-covariance matrix (G-matrix) of  
29 the traits, we showed that the responses of most floral traits including volatiles were  
30 predicted well in artificial- and bumblebee-selection experiment. Genetic covariance  
31 had a mixed of constrained and facilitated effects on evolutionary responses. We  
32 further revealed that G-matrix also evolved in the selection processes. Nevertheless,  
33 the ancestral G-matrix can still be used for predicting micro-evolutionary scenarios.

34 **Conclusions**

35 Overall, our integrative study shows that floral signals, and especially volatiles,  
36 evolve under selection in a mostly predictable way, at least during short term  
37 evolution. Evolutionary constraints stemming from genetic covariance affected traits  
38 evolutionary trajectories and thus it is important to include genetic covariance for  
39 predicting the evolutionary changes of a comprehensive suite of traits. Other  
40 processes such as resource limitation and selfing also needs to be considered for a  
41 better understanding of floral trait evolution.

42 **Key words:** adaptive evolution, artificial selection, *Brassica rapa*, experimental  
43 evolution, floral scent, G-matrix, multivariate prediction, pollinator selection.

#### 44 **Introduction**

45 Flowers are complex organs with enormous diversity in morphology, color and scent.  
46 These visual and olfactory components, which characterize the radiation of  
47 angiosperms, are recognized to evolve as a means of interaction with their biotic  
48 environment (Schiestl & Johnson, 2013; Leonard & Francis, 2017). One important  
49 driver, the pollinators, has been emphasized to be important for floral trait evolution  
50 since long (Darwin, 1862; Grant, 1949). However, only a handful studies have  
51 attempted to test the predicted adaptive evolution of floral traits to pollinator selection  
52 (Campbell, 1996; Galen, 1996; Mitchell *et al.*, 1998; Morgan & Ashman, 2003;  
53 Caruso, 2004). Moreover, these studies only examined one or a few morphological  
54 traits at a time, whereas interactions of flowers with other organisms are typically  
55 mediated by a combination of traits of morphological and/or olfactory nature (Raguso  
56 & Willis, 2005; Schiestl, 2015). Therefore, a well-designed experiment with multiple  
57 traits measurement is required to predict and test the joint evolution of a suite of floral  
58 traits under natural or artificial selection.

59 Mathematically, genetic (co)variance matrix (G-matrix) and phenotypic  
60 selection ( $\beta$ ) are the two parameters for predicting the evolutionary changes ( $\Delta z$ ) of a  
61 suite of traits by using multivariate breeder's equation  $\Delta z = G * \beta$  (Lande, 1979;  
62 Lande & Arnold, 1983). A great number of empirical studies have documented  
63 significant heritability and genetic (co)variance of diverse floral traits (Ashman &  
64 Majetic, 2006; Kaczorowski *et al.*, 2008; Zu *et al.*, 2016; Zu & Schiestl, 2017), as  
65 well as phenotypic selection acting on them (Gómez, 2003; Irwin & Strauss, 2005;  
66 Sandring & Ågren, 2009; Sletvold & Ågren, 2010; Hopkins & Rausher, 2012;  
67 Parachnowitsch *et al.*, 2012; Ågren *et al.*, 2013; Gross *et al.*, 2016; Gervasi &  
68 Schiestl, 2017). Among those traits, floral scents have rarely been considered. Floral  
69 scents are usually highly variable and diverse on all taxonomic levels (Knudsen  
70 2006). We recently showed that this variation has a strong heritable genetic  
71 component (20% - 45%, Zu *et al.*, 2016). Together with studies documenting natural  
72 selection on scent (Schiestl *et al.*, 2010; Ehrlén *et al.*, 2012; Parachnowitsch *et al.*,  
73 2012; Gross *et al.*, 2016; Gervasi & Schiestl, 2017), this suggests that their evolution  
74 can be predicted, although such predictions have never been attempted.

75 In this study, we predict floral traits evolution and test the predictive power of  
76 complex trait evolution using a G-matrix. We used data from two forward-in-time  
77 experimental evolution experiments that documented genetic co-variation and  
78 evolutionary responses in floral traits of fast cycling *Brassica rapa* plants. The first  
79 parameter G of the plant population was estimated from a three-generation bi-  
80 directional artificial selection experiment on plant height (Zu & Schiestl, 2017). In  
81 that study, tall- and short-plants were selected artificially for building the two  
82 directional lines, in addition to a control line built with randomly selected plants. Four  
83 morphological floral traits and 12 floral volatiles were measured for each generation.  
84 Control lines in this experiment were used to estimate G-matrix. The other parameter  
85  $\beta$  was calculated from four evolutionary scenarios: two from the tall- and short-  
86 selection lines in the artificial selection experiment mentioned above (Zu & Schiestl,  
87 2017); the other two from a 9-generation pollinator selection experiment (Gervasi &  
88 Schiestl, 2017). The pollinator selection experiment was carried out with bumblebees  
89 and hoverflies as the selection agents separately. The same set of floral traits were  
90 measured, and the parental plants were from the same seed bank as in the artificial-  
91 selection experiment.

92 In addition to the primary goal of this study to predict and examine floral traits  
93 evolution by employing the multivariate breeder's equation, we also tested how the  
94 evolutionary trajectory of a trait would be affected (constrained/enhanced) by genetic  
95 correlations with traits by dissecting the total responses to selection into direct  
96 responses (caused by direct selection on target traits) and indirect responses (caused  
97 correlated responses through genetic covariance). Moreover, we assessed the  
98 evolution of genetic architectures (G-matrices) throughout the artificial selection  
99 processes.

## 100 **Results**

### 101 *Predictions in the artificial selection experiment*

102 Tall- and short-directional selection can be regarded as the mirrored replicate to each  
103 other. The selection gradients of tall and short artificial selection lines were  
104 approximately opposite numbers to each other (Table S1), leading to a symmetric  
105 pattern of predicted changes of the floral traits: most traits increased in tall line and  
106 decreased in short line (Fig. 1). Plant height, the direct and only target of artificial

107 selection, was predicted accurately in both lines. Flower size traits (PW marginally,  
108 PL and FL) were predicted to decrease in short lines and matched the observations,  
109 and increase in tall lines, and, however, mismatched the observations (Fig. 1). VOCs  
110 were predicted well in most cases (filled violin plots, Fig. 1) in both lines except for  
111 three compounds in short lines (empty violin plots, Fig. 1). Note that the amount of  
112 some VOCs did not change significantly (red dashed-outlined violins, Fig. 1)  
113 although the predictions were correct (filled violins, Fig. 1).

#### 114 *Predictions in the pollinator-selection experiment*

115 In this experiment, selection was stronger in the bumblebee than the hoverfly  
116 treatment (Table S2). Consequently, observed and predicted changes were larger in  
117 the bumblebee than the hoverfly treatment (Fig. 1, Fig. S1; Table 1). In the  
118 bumblebee treatment, our predictions overestimated the evolutionary changes of all  
119 morphological traits, while responses of scent compounds (all 12 but benzyl nitrile,  
120 BenN) were correctly predicted (Fig. 1; Table 1). Among these seven VOCs  
121 significantly increased (solid-outlined violins, Fig. 1), and the other four VOCs were  
122 not (dashed-outlined violins, Fig. 1). In the hoverfly treatment, evolutionary responses  
123 of only 4 traits were correctly predicted (Fig. 1, Fig. S1; Table 1), among which petal  
124 length (PL) was the only one trait that changed significantly (solid-outlined violins).

#### 125 *Effects of genetic covariance on predicting evolutionary trajectories*

126 We separate genetic variance-covariance matrix ( $\mathbf{G}$ ) into genetic variance matrix ( $\mathbf{G0}$ )  
127 and genetic covariance matrix ( $\mathbf{G}'$ ). By comparing evolutionary responses using these  
128 three different matrices with the observed changes, we can disentangle the effects of  
129 genetic covariance on prediction. In the artificial selection experiment, the only trait  
130 under direct selection was height (i.e.,  $\beta$  has only one non-zero element, see Table  
131 S1), and the observed changes in the other traits are thus entirely composed of their  
132 indirect responses to the selection on height.

133 In the bumblebee selection experiment, selection targeted multiple traits with a  
134 mixture of positive and negative values (seven positive and nine negative values,  
135 Table S2). The direct component of the response predicted from the  $\mathbf{G0}$ -matrix,  
136 reflecting the nature of the selection acting on them, showed the same positive or  
137 negative responses corresponding to their selection (Table 1). However, the observed  
138 responses were positive for all but one trait (MeS) (Table 1). Total predicted

139 responses (predicted from  $\mathbf{G}$ -matrix) and indirect responses (predicted from  $\mathbf{G}'$ -  
140 matrix) were all positive, if not insignificant from zero (Table 1). The opposition  
141 between negative selection and positive total response is indicative of strong  
142 constraints acting on targets of negative selection. On the other hand, the response to  
143 selection was facilitated in the direction of selection when both the direct and indirect  
144 components of the response are aligned with the selection gradient, as found for  
145 height (Height), phenylacetaldehyde (PAA), methyl salicylate (MeB), and indole  
146 (Ind) (Table 1).

147 The picture was different in the hoverfly treatment with a mix of positive and  
148 negative observed trait changes and eight traits with a predicted direct response in the  
149 same direction, but no selection gradient significantly different from zero. Phenotypic  
150 changes were better predicted without covariance only for petal width and petal  
151 length in the bumblebee experiment and flower diameter in the hoverfly experiment  
152 (Table 1).

153 In addition to comparing the effects of genetic covariance on individual traits,  
154 we measured the overall constraining effect of genetic co-variation on the response to  
155 selection by comparing the angle  $\theta$  between the selection response vector ( $\Delta\mathbf{z}$ ) and  
156 the first PC of  $\mathbf{G}$  (PC1, or  $\mathbf{g}_{\max}$ ) with the angle  $\gamma$  between  $\Delta\mathbf{z}$  and the selection  
157 gradient ( $\beta$ ). In the tall and short artificial selection experiments, the trait responses  
158 were strongly aligned with  $\mathbf{g}_{\max}$ , with  $\theta$  angle of 12.5 degree (95% HPD: 9.2, 16.6)  
159 and 11.2 degree (95% HPD: 7.2, 14.7), respectively. Given the close association of  
160  $\mathbf{g}_{\max}$  with the first trait axis (height) (Fig. 2c) and thus with the selection gradients  
161 under artificial selection, the angle  $\gamma$  between  $\Delta\mathbf{z}$  and  $\beta$  is 9.9 and 8.9 degree in tall  
162 and short, respectively, which are within the 95% HPD of  $\theta$  in both cases. In contrast,  
163 under pollinator selection,  $\Delta\mathbf{z}$  is more aligned with  $\mathbf{g}_{\max}$  than  $\beta$ , with  $\theta$  of 26.9 degree  
164 (95% HPD: 22.3, 33) and 60.8 degree (95% HPD: 57.1, 63.5), when compared to  $\gamma$ ,  
165 equal to 66.5 and 89.2 degree for bumblebee and hoverfly treatments, respectively.

#### 166 *Evolution of the G-matrix during artificial selection*

167 By examining the G-matrices of the three lines in the artificial selection experiment,  
168 we found that a drastic decrease of the additive genetic variance of height in the tall  
169 line, with an estimate around 2.8 cm<sup>2</sup>, compared to the short line, which remained as  
170 high as in the control line around 23 cm<sup>2</sup>. This resulted in a large decrease of the

171 contribution of  $\mathbf{g}_{\max}$  (PC1) of  $\mathbf{G}_{\text{tall}}$  to the total variance relative to  $\mathbf{G}_{\text{control}}$  and  $\mathbf{G}_{\text{short}}$   
172 (see Fig. 2a-b, Table S5). The orientation of  $\mathbf{g}_{\max}$  also changed in  $\mathbf{G}_{\text{tall}}$ , with reduced  
173 alignment with the height axis (Fig. 2c). The other eigenvalues and eigenvectors are,  
174 however, more constant across lines (Fig. 2a). For instance, the second eigenvector  
175 (PC2) is more consistently orthogonal to the height trait axis in the three  $\mathbf{G}$ -matrices  
176 (Fig. 2c).

177         Using the random skewers method, we found strong correlations of the mean  
178 selection response among matrices, larger than 70% for all three comparisons,  
179 although not significantly so between  $\mathbf{G}_{\text{tall}}$  and  $\mathbf{G}_{\text{short}}$ , and very strong similarity  
180 between  $\mathbf{G}_{\text{control}}$  and  $\mathbf{G}_{\text{short}}$  (Table 2). The three  $\mathbf{G}$ -matrices thus shared a significant  
181 portion of their structure.  $\mathbf{G}_{\text{control}}$  would predict selection responses similar to  $\mathbf{G}_{\text{short}}$   
182 and to a lesser extent to  $\mathbf{G}_{\text{tall}}$ . Further analysis of the similarity of the size and  
183 orientation of the eigenvectors of the  $\mathbf{G}$ -matrices in the hierarchical analysis  
184 confirmed the similarity in shape between  $\mathbf{G}_{\text{control}}$  and  $\mathbf{G}_{\text{short}}$  and the dissimilarity of  
185  $\mathbf{G}_{\text{tall}}$  with  $\mathbf{G}_{\text{control}}$ , and with  $\mathbf{G}_{\text{short}}$  to a smaller degree (see Table 2). The  $\mathbf{G}$ -matrix in  
186 the tall lines thus evolved more than in the short lines mostly because of the change in  
187 the genetic variance of plant height.  $\mathbf{G}_{\text{short}}$  remained closer to the starting  $\mathbf{G}$ -matrix  
188 ( $\mathbf{G}_{\text{control}}$ ) over the course of the experiment.

#### 189 *Evaluation of the estimation of the $\mathbf{G}$ -matrices*

190 Randomization tests of  $\mathbf{G}$ -matrices were conducted to examine whether  $\mathbf{G}$ -matrix  
191 captured the meaningful biological structures rather than random assembling. The  
192 results revealed that  $\mathbf{G}_{\text{control}}$  was estimated with highest accuracy compared to  $\mathbf{G}_{\text{tall}}$  and  
193  $\mathbf{G}_{\text{short}}$ . The majority of the genetic covariance elements (101 out of 120) and additive  
194 genetic variances (14 out of 16) in  $\mathbf{G}_{\text{control}}$  were significant at the level of  $\text{FDR} < 0.05$ ,  
195 after correcting for multiple testing (false discovery rate: Benjamini & Hochberg  
196 1995). In  $\mathbf{G}_{\text{tall}}$ , 11 variance and 55 covariance elements were significant, and 15 and  
197 72 elements, respectively, in  $\mathbf{G}_{\text{short}}$  (Table S4), at the same FDR level.

## 198 **Discussion**

199 Total evolutionary responses are made up of direct and indirect responses. We could  
200 predict the evolutionary response of floral traits subject to two types of selection  
201 pressures by combining estimates of the ancestral  $\mathbf{G}$ -matrix of the traits with estimates  
202 of the selection gradients acting on them, with relatively high accuracy. Importantly,

203 we found that predictions based only on the direct trait responses to selection failed to  
204 predict the observed responses and that the observed responses were biased towards  
205 the line of least genetic resistance ( $\mathbf{g}_{\max}$ ) of the G-matrix. This indicates that making  
206 correct evolutionary predictions requires the additional knowledge of the indirect trait  
207 responses caused by multivariate selection acting on genetically correlated phenotypic  
208 traits. The pattern of genetic covariation among traits thus strongly affected the  
209 outcome of selection in the artificial and pollinator selection experiments. Although  
210 this pattern of trait covariation can change during evolution, we further showed that  
211 using an ancestral G-matrix, here estimated in the control lines, can lead to accurate  
212 evolutionary predictions over just a few generations. This approach allowed us to  
213 better understand how pollinators, the selective agents, interact with the complex set  
214 of floral traits composed of floral scent and morphology and may influence their  
215 evolution.

216 We observed a few discrepancies between our evolutionary predictions and  
217 observed responses that need to be examined. In particular, the responses of the  
218 morphological traits in the artificial selection for tall plants did not show the expected  
219 increase of flower size but instead showed a decrease, despite the positive genetic  
220 correlations of flower size with plant height (see  $\mathbf{G}_{\text{control}}$  in Table S4), which remained  
221 positive during selection (see  $\mathbf{G}_{\text{tall}}$  in Table S4). It thus cannot be caused by an  
222 evolutionary change of the sign of the genetic correlations with height. Instead, this  
223 selection experiment may have revealed an underlying resource allocation trade-off  
224 masked by the apparent positive genetic covariation between plant height and the size  
225 of the reproductive organs. This is reminiscent of classical theory on the effect of  
226 variation in resource acquisition and allocation on fitness components (Van  
227 Noordwijk & de Jong, 1986; Houle, 1992; Agrawal *et al.*, 2010), which states that a  
228 positive correlation between fitness components can be observed despite an  
229 underlying trade-off when individuals vary more in the acquisition than in the  
230 allocation of their resources. Variation in resource acquisition among the genotypes  
231 may have been pre-existing in the base population of *B. rapa*, and lead to the  
232 observed positive correlation between traits pertaining to two fitness components,  
233 plant reproduction for flower size traits, and plant somatic growth for plant height.  
234 However, the observation of a negative correlated response of flower size to selection  
235 for reduced plant height in the low artificial selection experiment is more in line with



236 a positive correlation between height and floral morphology. This may be caused by  
237 unconstrained allometries when selecting for smaller plants where resource limitation  
238 may be less stringent than when selecting for taller plants.

239 In contrast to flower size, we found mismatches of our predictions of the  
240 response of floral volatiles to artificial- and bumblebee-selection in the cases where  
241 predictions of reduced scent concentration were not observed. This finding is  
242 consistent with another study using the same plant genotypes and conducting bi-  
243 directional artificial selection on floral volatiles, which showed that they responded  
244 strongly to upward selection but hardly changed in response to downward selection  
245 (Zu *et al.*, 2016). This lack of response for reduced concentrations may be caused by  
246 the natural low amounts of volatiles in the starting population, minimizing the genetic  
247 variance in the downward direction (Zu *et al.*, 2016). Finally, the large overshooting  
248 of the predictions of the response of plant height and flower size in the bumblebee  
249 experiment is probably due to an overestimation of the genetic variance of the  
250 morphological traits, although we cannot test for this hypothesis because we are  
251 missing an estimate of the G-matrix in that 9-generation selection experiment.

252 In contrast to predictions in the bumblebee-pollinated plants, the ones in  
253 hoverfly-pollinated plants were largely not different from zero or incorrect. The  
254 observed changes were also not consistently in the same direction, implying that an  
255 evolutionary response along one major axis of overall positive trait co-variation is not  
256 likely, at least when estimating the co-linearity of the response vector with  $\mathbf{g}_{\max}$  of  
257  $\mathbf{G}_{\text{control}}$ . Instead, the observed change is more consistent with very weak selection and  
258 altered patterns of trait covariation. Indeed, in the hoverfly-selection experiment, a  
259 separate study found very little adaptive evolution in plant traits with the exception of  
260 strongly increased autonomous selfing (Gervasi & Schiestl, 2017). Thus, increased  
261 selfing and the associated reduction of genetic variation (Charlesworth, 2003),  
262 possibly altered the G-matrix, leading to the low accuracy of our predictions and the  
263 reduced efficiency of pollinator-induced selection. Previous studies in bottlenecked  
264 insect populations have shown that rapid changes in the G-matrix are expected in  
265 inbred populations (e.g., Phillips *et al.* 2001, Whitlock *et al.* 2002).

266 ***Targets of bumblebee selection***

267 Overall, bumblebee selection was in favor of taller plants with bigger petals and  
268 increased concentration of certain odor volatiles, most notably indole and methyl  
269 benzoate (see also Gervasi and Schiestl 2017). Because of the largely positive genetic  
270 correlation of most floral traits with height, it is not surprising to observe positive  
271 selection responses of those traits, and our evolutionary predictions match well with  
272 that pattern. However, our analysis revealed that some of those responses may be  
273 maladaptive because opposed to the selection gradient acting on them (e.g.,  
274 benzaldehyde and benzyl nitrile, see Tables 1 and S2). This suggests that bumblebees  
275 tended to dislike flowers with increased concentration of those volatiles, whose  
276 increased observed amounts were caused by indirect selection on height and other  
277 positively correlated traits under positive selection. These indirect selection responses  
278 thus pushed the trait values further away from their optimum values and have  
279 emphasized or even created the negative selection gradient acting on them. However,  
280 without estimates of the selection gradient at each generation we cannot ascertain  
281 whether those traits are generally under negative selection by pollinators who disliked  
282 such compounds from the start or whether the negative selection gradients appeared  
283 as an indirect consequence of pollinator selection on correlated traits after the start of  
284 the selection experiment. In any case, their positive, non-adaptive responses point to  
285 the existence of strong evolutionary constraints acting on them. Overall, knowledge of  
286 the selection gradient, the G-matrix and selection response of the traits showed that  
287 they evolved in a direction biased towards  $g_{\max}$ , the "line of least resistance" (Schluter  
288 1996), which constrained the evolutionary response away from the selection gradient,  
289 although the selection responses of some traits were enhanced by trait covariation.

### 290 ***The role of genetic covariance in adaptive evolution***

291 Our results are in line with the established expectation that genetic covariance can  
292 influence traits' evolutionary response by constraining or augmenting their response to  
293 selection depending on the relative signs of genetic covariances and selection  
294 gradients (Lande 1979; Arnold et al. 2001; Walsh & Blows 2009). This expectation  
295 has been rarely directly tested with experimental evolution as we did here (see also  
296 Careau et al. 2014). More commonly, empirical studies use estimates of contemporary  
297 selection gradients and G-matrices to evaluate the potential for evolutionary  
298 constraints, which are present in some cases (e.g., Blows et al. 2004; Smith &

299 Rausher 2008; Wailing et al. 2014; Teplitsky et al. 2014) but not in others (e.g.,  
300 Merilä & Björklund 1999; McGuigan et al. 2005; Berner et al. 2010).

301 The relevance of predictions of evolutionary constraints depends on the  
302 constancy of patterns of genetic variance-covariance over time. Our study shows that  
303 constancy cannot be assured when selection strongly reduces the genetic variance of a  
304 trait, as during artificial selection for taller plants (see also Doroszuk et al. 2008;  
305 Björklund et al. 2013; Careau et al. 2014). Yet, using  $\mathbf{G}_{\text{control}}$  as an estimate of the  
306 ancestral G-matrix allowed us to make correct evolutionary predictions in most cases.  
307 Had we used  $\mathbf{G}_{\text{tall}}$  in the tall selection experiment, we would have badly  
308 underestimated the selection response of plant height and floral scent (results not  
309 shown). This illustrates two important points concerning the evolutionary significance  
310 of the structure of the G-matrix. First, changes in  $\mathbf{G}$  can happen quickly, over just a  
311 few generations, and we have illustrated a rapid change in trait variance caused by  
312 selection. Second, despite those changes, estimation of  $\mathbf{G}$  is still useful to make  
313 predictions of future trait changes over few generations. This can be useful to predict  
314 evolution and adaptation under rapid environmental changes, for instance, because the  
315 state of the G-matrix before a change in selection pressures will strongly influence the  
316 resulting evolutionary trajectory of a population, as we have shown.

317 The evolutionary significance of the structure of the G-matrix is still debated,  
318 especially regarding the interpretation of the constraining effects of the main  
319 eigenvectors of  $\mathbf{G}$  (especially  $\mathbf{g}_{\text{max}}$ ). The debate, however, mostly crystallized on  
320 inferences of past evolutionary constraints from contemporary estimates of trait  
321 variance-covariance patterns. The retrospective use of  $\mathbf{G}$  is questionable knowing how  
322 evolutionarily labile are patterns of variance-covariance, an important caveat already  
323 emphasized by Turelli (1988). Indeed, many processes may affect the evolution of  
324 trait variance and covariances because they depend on variation in allele frequencies  
325 in a population. As such, genetic drift (Jones et al. 2003) and fluctuating selection  
326 (Jones et al. 2004), have been shown to reduce the stability of the G-matrix, while  
327 migration (Guillaume & Whitlock 2007), correlational selection (Jones et al. 2003),  
328 and mutation (Jones et al. 2003, Chebib & Guillaume 2017) can improve its stability  
329 (reviewed in Arnold et al. 2008). Those changes thus make retrospective use of  $\mathbf{G}$  at  
330 the least dangerous, unless its long-term stability can be determined. Prospective use  
331 of  $\mathbf{G}$  is potentially less sensitive to such variations when predicting short term

332 selection responses. Our analysis provides a good illustration of the prospective  
333 versus retrospective usage of a G-matrix when considering the changes in  $\mathbf{G}$ 's  
334 structure between  $\mathbf{G}_{\text{control}}$  and  $\mathbf{G}_{\text{tall}}$  and the respective predictions and inferences we  
335 can make from them.

### 336 **Outlook**

337 Our study showed that even highly plastic chemical traits such as floral scent, can be  
338 successfully included into predictive models of floral trait evolution. Even more so,  
339 we show that a complementary set of traits is important to consider, because  
340 pollinator selection acts on multiple traits, and genetic correlations link them in their  
341 evolutionary response. In the future, improved sampling and analysis techniques may  
342 allow the standard inclusion of a large set of traits and large sample sizes into  
343 evolutionary studies. Larger sample sizes may allow more accurate prediction models  
344 by incorporating the dynamics of G-matrix evolution over multiple generations. In  
345 addition, more assessments of selection on those traits in nature by specific groups of  
346 interacting organisms (Ehrlén *et al.*, 2012; Ågren *et al.*, 2013; Vanhoenacker *et al.*,  
347 2013; Gross *et al.*, 2016; Ramos & Schiestl, 2019) may further improve our ability to  
348 predict evolutionary changes in the face of environmental change in natural habitats.

### 349 **Materials and methods**

350 The workflow of the main analysis procedures is summarized in Fig. S1.

#### 351 **Plant species and focal traits**

352 In our experiment, we used the rapid cycling *Brassica rapa* L. (syn. *B. campestris*:  
353 Brassicaceae) from the Wisconsin Fast Plants<sup>TM</sup> Program (Carolina Biological Supply  
354 Company, Burlington, NC, USA), selected for short generation time, rapid seed  
355 maturation, absence of seed dormancy, small plant size and high female fertility  
356 (Williams & Hill, 1986). *Brassica rapa* is a self-incompatible species with a  
357 generalized pollination system (e.g. bees, syrphid flies and butterflies as pollinators).  
358 The line used needs only ca. 35 to 40 days to complete a life cycle and maintains  
359 sufficient genetic variability for selection experiments (Miller & Schemske, 1990;  
360 Ågren & Schemske, 1992; Zu *et al.*, 2016; Zu & Schiestl, 2017).

361 Our analysis includes a total of 16 traits with 12 floral volatile organic  
362 compounds (VOCs), and 4 morphological traits (plant height, petal width, petal

363 length, and flower diameter). The measurement methods were described in detail in  
364 Zu & Schiestl (2017). Floral VOCs were collected from at least four freshly opened  
365 flowers per plant at a flow rate of 100 mL per min for 3 hours. Floral VOC amounts  
366 were standardized in amounts per flower per liter sampled air, and log transformed  
367 (by  $\ln(x + 1)$ ,  $x$  being the raw value) prior to statistical analysis to approach normal  
368 distributions. Scent collection and analysis details can be found in Supporting  
369 information. The whole experiment was conducted at the Botanical Garden of the  
370 University of Zürich.

### 371 **Experiment I: artificial selection experiment**

372 Details of the experimental procedure for artificial selection can be found in Zu &  
373 Schiestl (2017). To summarize, we sowed out 150 seeds to form the parental  
374 generation. Up and down directional artificial selection on plant height were imposed  
375 to produce a tall and a short line with the ten tallest and ten shortest plants,  
376 respectively. Additionally, ten randomly selected plants were chosen to form a control  
377 line. Selected plants were randomly hand pollinated within each line. Pollen donor,  
378 pollen receiver and their offspring were labeled for each fruit to generate a breeding  
379 pedigree. After fruit maturation, around 50 seeds from each of the three lines were  
380 sown out to form the next generation. The same procedures were carried out to obtain  
381 three generations of selection. Extra seeds were sowed out to ensure a minimum of  
382 150 individual plants in each generation. In total, we analyzed 628 plants. The  
383 experiment was conducted in a phytotron with 24h fluorescent light per day, 22°C,  
384 60% relative humidity, and regular watering twice a day (at 08:00 and 18:00).

### 385 **Experiment II: pollinator selection experiments**

386 The procedures of experimental evolution experiment can be found in detail in  
387 Gervasi & Schiestl (2017). To summarize, we sowed out 300 seeds to generate 108  
388 full sib families by manual cross pollination. These 108 full sib families were then  
389 equally divided into three replicates each containing 36 plants, for each of the three  
390 treatments (bumblebee, hoverfly, and hand pollination treatment). In each replicate,  
391 the 36 plants were placed in a 6×6 array with a distance of 20 cm from each other in a  
392 flight cage (2.5m×1.8m×1.2m). In bumblebee and hoverfly treatments, five  
393 pollinators (either *Bombus terrestris* or *Episyrphus balteatus*) were introduced one at  
394 a time in the flight cage, with each allowed to freely visit maximal three different

395 plants before being removed from the cage. A total number of 12 - 15 out of 36 plants  
396 per replicate received one or more pollinator visitation. The average ( $\pm$  s.d.) visitation  
397 (in visited plants) was  $1.35 \pm 0.63$  for bumblebee-pollinated plants and  $1.28 \pm 0.53$  for  
398 hoverfly-pollinated plants. In the control treatment 12 plants were randomly chosen  
399 and were manually pollinated among each other. Floral traits were measured prior to  
400 pollinators' visits or hand pollination. The number of seeds were recorded after fruit  
401 maturation. Seeds from the pollinated plants were sown out proportionally  
402 ((individual seed set /replicate sum of seeds) $\times$ 36, values below 0.5 were rounded up  
403 to 1) to form again a total number of 36 plants for the next generation of each  
404 replicate. The same selection and sowing-out procedures were conducted for 9  
405 generations, after which plants were sowed out again and randomly hand crossed  
406 between the replicates within each treatment to get rid of potential inbreeding  
407 depression. Fruits from random crosses were sown out to form the 11<sup>th</sup> generation and  
408 the measurements of floral traits in this generation were used as observed responses to  
409 selection.

#### 410 **Estimation of the genetic variance-covariance matrices (G-matrix)**

411 With known breeding pedigree and plant trait values for each individual in the control  
412 and treatment lines of the artificial selection experiment, we were able to estimate  
413 three genetic variance-covariance matrices:  $\mathbf{G}_{\text{control}}$  in control,  $\mathbf{G}_{\text{tall}}$  (or  $\mathbf{G}_{\text{short}}$ ) in  
414 selection lines for increased (or decreased) plant height (see Table S3). The pedigree  
415 of the seeds sowed in the pollinator experiment was unknown. We thus used  $\mathbf{G}_{\text{control}}$   
416 from artificial selection experiment for evolutionary predictions in both experiments.  
417 More specifically, we estimated the G-matrix of the 16 traits by using a multivariate  
418 animal model in which the kinship (relatedness) matrix was obtained from the four-  
419 generation pedigree of the plants crossed within the experiments (sire = pollen donor,  
420 dam = pollen receiver), independently in the control, tall, and short experimental lines  
421 (Table S3). We fitted a linear mixed model using the Bayesian method implemented  
422 in the MCMCglmm R package (Hadfield, 2010) to estimate random effect variance  
423 components for additive genetic effects ( $V_A$ ) from which we estimated the G-matrix,  
424 and among-dam ( $V_D$ ) and among-sire ( $V_S$ ) components to remove potential maternal  
425 and paternal effects, respectively. We added generation as a block factor modeled as a  
426 fixed effect. This method was previously shown to have good applications with a few  
427 traits (Reid, 2012; Teplitsky *et al.*, 2014).

428 In MCMCglmm, we used weakly informative inverse-Wishart prior with limit  
429 variance of one and covariance of zero and low degree of belief (0.002). Posterior  
430 distributions were robust to several different prior settings (e.g.  $V = \text{diag}(n) \times 0.1$ ,  $V =$   
431  $\text{diag}(n) \times 10$ ,  $n =$  number of traits). We used 1,200,000 iterations, with a burn-in of  
432 200,000 and a thinning of 500 to ensure convergence and low autocorrelation among  
433 thinned samples ( $< 0.1$ ). The thinning resulted in a posterior distribution with 2000  
434 samples.

435 Finally, because the Bayesian approach does not allow us to directly test for the  
436 accuracy of our estimates of the G-matrices, we implemented a permutation test in  
437 which we randomly shuffled the dam and sire of each offspring within each  
438 generation and re-estimated the G-matrix for each of 500 replicates using the same  
439 MCMCglmm procedure as before. To evaluate the accuracy of the observed G-  
440 matrices ( $\mathbf{G}_{\text{control}}$ ,  $\mathbf{G}_{\text{tall}}$ , and  $\mathbf{G}_{\text{short}}$ ), we then compared them to their randomized  
441 estimates, element by element. For each element, we computed an empirical  $P$ -value  
442 as:  $P = (N_{\text{random. estimates} < \text{observed.value}}) / 500$ . If the observed value was smaller than the  
443 mean of the random estimates, then  $(1 - P)$  was used instead of  $P$ . The random  
444 estimates were obtained from the posterior mode of the 500 random estimates of each  
445 G-matrix. An element of  $\mathbf{G}$  (a variance or covariance term within  $\mathbf{G}$ ) was considered  
446 significant if its  $P$ -value was  $< 0.05$ . If it was not the case, then the specific element  
447 estimation did not capture its biological meaning.

#### 448 **Estimation of selection gradients**

449 In the artificial selection experiment, we calculated the selection gradient on height  
450 ( $\beta_h$ ) by using

451

$$452 \beta_h = S/V_P,$$

453

454 where  $V_P$  is the phenotypic variation of height and  $S$  the selection differential  
455 calculated as the difference between the mean plant height of the selected plants and  
456 all measured plants in the same generation.

457 We calculated  $\beta_h$  in each generation and each selected line (table S1) and used  
458 its sum over the three generations to predict the accumulated evolutionary responses  
459 in each line.

460 In the pollinator selection experiments, we estimated the selection gradients  
461 following the partial correlation approach of Lande and Arnold (1983). We used  
462 generalized linear models with fitness as dependent variable and morphological and  
463 scent variable as covariates. We estimated fitness as the total number of seeds  
464 produced per plant (female fitness component) plus a male fitness component gained  
465 through pollen export. We calculated the male component as the product of “number  
466 of pollinator visits” (i.e. number of visits by pollinators to a given plant) times their  
467 respective efficiency. Pollinator efficiency is the average of the resulting number of  
468 “seeds per fruit” per single pollinator visit to a plant across all generations. Pollinator  
469 efficiency was strongly species dependent (mean  $\pm$  S.D.: bumblebee:  $10.57 \pm 6.34$ ;  
470 hoverfly:  $4.81 \pm 3.83$ ;  $t_{267} = 10.11$ ,  $P < 0.001$ ). Fitness was  $\ln(1+x)$  transformed before  
471 analysis to reach normality. The average per generation selection gradients ( $\beta$ ) were  
472 calculated separately per treatment (bumblebee, hoverfly, and control), for all the  
473 measured generations and replicates combined (for details, see Gervasi and Schiestl  
474 2017). Therefore, we used  $9 * \beta$  to predict the total evolutionary changes after 9  
475 generations of pollinator selection. The non-significant selection gradients were still  
476 used as the best approximate estimations of selection.

#### 477 **Calculation of predicted and observed evolutionary changes**

478 To estimate the predicted responses to selection, we used the multivariate breeder's  
479 equation (Lande, 1979),  $\Delta \mathbf{z} = \mathbf{G} * \beta$ . We used  $\mathbf{G}$  from the control group in the artificial  
480 selection experiment ( $\mathbf{G}_{\text{control}}$ , Table S3, S4) for predictions as the best estimation of  
481 genetic architecture of the original population. We used the 2000 posterior samples of  
482 the G-matrix to generate a distribution of predicted trait changes from which we could  
483 evaluate the accuracy of our evolutionary prediction using its 95% highest posterior  
484 density (HPD) interval.

485 To calculate the observed trait changes, we did three step calculations as  
486 follows (Fig. S1). 1) We calculated the absolute phenotypic changes between the last  
487 and the first generation ( $\Delta z_{\text{obs.}} = \bar{X}_{F_n} - \bar{X}_P$ , where n is 3 in artificial selection  
488 experiment, and 11 in pollinator selection experiment) for each line or each treatment,



489 and P stands for 'parental'. 2) We estimated environmental fluctuations by using the  
490 control groups. Ideally, there should be no selection and no systematic changes of trait  
491 values in the control groups beside random fluctuations. However, traits values may  
492 have changed due to unaccounted-for selection pressures unknown to the  
493 experimenters. Therefore, we subtracted the predicted changes due to unknown  
494 selection ( $\mathbf{G}^* \boldsymbol{\beta}_{\text{control}} = \Delta \mathbf{z}_{\text{control\_pred.}}$ ) from the observed changes in control group to  
495 estimate environmental fluctuations. We calculated environmental fluctuations in both  
496 artificial- and pollinator-selection experiments. 3) We subtracted the environmental  
497 fluctuations (values in step 2) from the absolute changes (values in step 1) and used  
498 the resulting values as the observed evolutionary changes to compare with predicted  
499 changes. We present the observed and predicted changes scaled by the phenotypic  
500 standard deviation of each trait in the parental generation.

### 501 **Direct and indirect selection responses**

502 To examine the importance of trait covariance in affecting evolutionary trajectories,  
503 we separated the total selection response  $\Delta \mathbf{z}$  of each trait into its direct and indirect  
504 components. The direct component of the predicted selection response is obtained by  
505 setting all genetic covariance to zero in  $\mathbf{G}_{\text{control}}$ , leading to the so-called **G0**-matrix  
506 (**G0**), and by multiplying **G0** by the selection vector  $\boldsymbol{\beta}$ . Accordingly, the direct  
507 response of trait  $i$  is the product  $G_{ii} * \beta_i$ , with  $G_{ii}$  the additive genetic variance of the  
508 trait (diagonal element of  $\mathbf{G}_{\text{control}}$ ). The indirect component is then obtained by setting  
509 all diagonal elements of  $\mathbf{G}$  to zero when computing  $\mathbf{G}^* \boldsymbol{\beta}$ , which is equal to  
510 subtracting the direct component from the total response  $\Delta \mathbf{z}$ . The three predictions,  
511 from direct (**G0**), indirect (**G'**), and total response (**G**) were compared to the observed  
512 change of each trait to evaluate when the direct response is constrained (direct and  
513 indirect components of opposite sign) or enhanced (direct and indirect components of  
514 same sign) by genetic covariance.

515 Finally, we measured the constraining effect of genetic co-variation on the  
516 response to selection by comparing the angle  $\boldsymbol{\theta}$  between the selection response vector  
517 ( $\Delta \mathbf{z}$ ) and the first PC of  $\mathbf{G}$  (PC1, or  $\mathbf{g}_{\text{max}}$ ) with the angle  $\boldsymbol{\gamma}$  between  $\Delta \mathbf{z}$  and the  
518 selection gradient ( $\boldsymbol{\beta}$ ). We generated the posterior distribution of  $\boldsymbol{\theta}$  from the posterior  
519 distribution of  $\mathbf{G}_{\text{control}}$ , which allowed us to test whether  $\boldsymbol{\gamma}$  is larger (smaller) than  $\boldsymbol{\theta}$ ,  
520 which tests if  $\Delta \mathbf{z}$  is biased (unbiased) in the direction of  $\mathbf{g}_{\text{max}}$  by genetic correlations.

521 **G-matrices similarity among artificial selection lines**

522 We compared the **G**-matrices from control, tall and short selection lines to assess the  
523 stability of **G** between treatments and control. We used the random skewers (RS)  
524 method in one comparison test because it examines the similarity between two **G**-  
525 matrices of their expected evolutionary response to a random set of selection vectors  
526 (skewers), which fits our purpose of evaluating the stability of such predictions using  
527 different estimates of the **G**-matrix. We used Roff et al.'s (2012) implementation of  
528 the RS method, and report the mean over 10,000 random selection skewers of the  
529 correlation between the selection response vectors of the two **G**-matrices compared.  
530 Significance was obtained from the distribution of the test statistics obtained from the  
531 500 random estimates of each **G**-matrix. We performed a further test of shape  
532 similarity between the **G**-matrices using the hierarchical approach of Roff et al.  
533 (2012), also known as the Flury hierarchy (Phillips & Arnold, 1999). This method  
534 tests the degree of shape similarity sequentially by comparing the size and orientation  
535 of the eigenvectors (principal components, PCs) of the **G**-matrices. Two **G**-matrices  
536 can have common principal components (CPC) if their PCs have the same orientation  
537 but not the same size (i.e., have different eigenvalues), be proportional if their PCs  
538 only differ proportionally, or be equal. The three levels of similarity are tested relative  
539 to the hypothesis of unrelated matrices. The test statistics are provided in Roff et al.  
540 (2012). We determined the significance of the RS and Flury tests using the previous  
541 500 randomized estimates of  $\mathbf{G}_{\text{control}}$ ,  $\mathbf{G}_{\text{tall}}$ , and  $\mathbf{G}_{\text{short}}$ .

542 All statistics were conducted with R version 3.3.3. (R Core Team, 2017).

543

544 **Acknowledgement**

545 We thank Jarrod Hadfield for his fast and helpful reply whenever we had questions  
546 related to MCMCglmm approach. The research leading to these results has received  
547 funding from the European Union's Seventh Framework Programme (FP7/2007-  
548 2013, FP7/2007-2011) under grant agreement no. 281093. FG was supported by grant  
549 PP00P3\_144846 from the Swiss National Science Foundation.

550 **Supporting information**

551 Details of some methods parts, *i.e.* floral scent collection and analysis, and comparing  
552 shape, size and orientation of **G**-matrices; as well as some additional supporting result  
553 tables and figures that cited in the main text can be found in the Supporting  
554 information part of this article.

#### 555 **Author Contribution**

556 PZ, FS, DG performed experimental data analysis; PZ, FG performed most of the  
557 evolutionary statistical analysis; XL, DR performed part of the prediction analysis;  
558 PZ, FS, FG wrote the manuscript; all authors revised the manuscript.

#### 559 **References**

560 **Agrawal AA, Conner JK, Rasmann S. 2010.** Tradeoffs and negative correlations in  
561 evolutionary ecology. *Evolution since Darwin: the first* **150**: 243-268.

562 **Ågren J, Hellström F, Toräng P, Ehrlén J. 2013.** Mutualists and antagonists drive  
563 among-population variation in selection and evolution of floral display in a  
564 perennial herb. *Proceedings of the National Academy of Sciences* **110**(45): 18202-  
565 18207.

566 **Ågren J, Schemske DW. 1992.** Artificial selection on trichome number in *Brassica*  
567 *rapa*. *Theoretical and Applied Genetics* **83**(6-7): 673-678.

568 **Ashman TL, Majetic CJ. 2006.** Genetic constraints on floral evolution: a review and  
569 evaluation of patterns. *Heredity* **96**(5): 343-352.

570 **Campbell DR. 1996.** Evolution of floral traits in a hermaphroditic plant: field  
571 measurements of heritabilities and genetic correlations. *Evolution* **50**(4): 1442-  
572 1453.

573 **Caruso CM. 2004.** The quantitative genetics of floral trait variation in *Lobelia*:  
574 potential constraints on adaptive evolution. *Evolution* **58**(4): 732-740.

575 **Charlesworth D. 2003.** Effects of inbreeding on the genetic diversity of populations.  
576 *Philosophical Transactions of the Royal Society B: Biological Sciences* **358**(1434):  
577 1051-1070.

578 **Darwin C. 1862.** *On the various Contrivances by which British and Foreign Orchids*  
579 *are Fertilised by Insects*. London: John Murray.

580 **Ehrlén J, Borg-Karlson A-K, Kolb A. 2012.** Selection on plant optical traits and  
581 floral scent: Effects via seed development and antagonistic interactions. *Basic and*  
582 *Applied Ecology* **13**(6): 509-515.

- 583 **Gómez JM. 2003.** Herbivory reduces the strength of pollinator-mediated selection in  
584 the Mediterranean herb *Erysimum mediohispanicum*: consequences for plant  
585 specialization. *The American Naturalist* **162**(2): 242-256.
- 586 **Galen C. 1996.** Rates of floral evolution: adaptation to bumblebee pollination in an  
587 alpine wildflower, *Polemonium viscosum*. *Evolution* **50**(1): 120-125.
- 588 **Gervasi D, Schiestl FP. 2017.** Real time divergent evolution in plants driven by  
589 pollinators. *Nature Communications* DOI: **10.1038/ncomms14691**.
- 590 **Grant V. 1949.** Pollination systems as isolating mechanisms in angiosperms.  
591 *Evolution* **3**: 82-97.
- 592 **Gross K, Sun M, Schiestl FP. 2016.** Why do floral perfumes become different?  
593 Region-specific selection on floral scent in a terrestrial orchid. *Plos One* **11**(2):  
594 e0147975.
- 595 **Hadfield JD. 2010.** MCMC methods for multi-response generalized linear mixed  
596 models: the MCMCglmm R package. *Journal of Statistical Software* **33**(2): 1-22.
- 597 **Hopkins R, Rausher MD. 2012.** Pollinator-mediated selection on flower color allele  
598 drives reinforcement. *Science* **335**(6072): 1090-1092.
- 599 **Houle D. 1992.** Comparing evolvability and variability of quantitative traits. *Genetics*  
600 **130**(1): 195-204.
- 601 **Irwin RE, Strauss SY. 2005.** Flower color microevolution in wild radish:  
602 evolutionary response to pollinator-mediated selection. *The American Naturalist*  
603 **165**(2): 225-237.
- 604 **Kaczorowski RL, Juenger TE, Holtsford TP. 2008.** Heritability and correlation  
605 structure of nectar and floral morphology traits in *Nicotiana glauca*. *Evolution* **62**(7):  
606 1738-1750.
- 607 **Lande R. 1979.** Quantitative genetic analysis of multivariate evolution, applied to  
608 brain: body size allometry. *Evolution* **33**(1): 402-416.
- 609 **Lande R, Arnold SJ. 1983.** The measurement of selection on correlated characters.  
610 *Evolution* **37**(6): 1210-1226.
- 611 **Leonard AS, Francis JS. 2017.** Plant–animal communication: past, present and  
612 future. *Evolutionary Ecology* **31**(2): 143-151.
- 613 **Miller TE, Schemske DW. 1990.** An experimental study of competitive performance  
614 in *Brassica rapa* (Cruciferae). *American Journal of Botany* **77**(8): 993-998.

- 615 **Mitchell RJ, Shaw RG, Waser NM. 1998.** Pollinator Selection, Quantitative  
616 Genetics, and Predicted Evolutionary Responses of Floral Traits in *Penstemon*  
617 *centranthifolius* (Scrophulariaceae). *International Journal of Plant Sciences* **159**(2):  
618 331-337.
- 619 **Morgan MT, Ashman TL. 2003.** Quantitative character evolution under complicated  
620 sexual systems, illustrated in gynodioecious *Fragaria virginiana*. *The American*  
621 *Naturalist* **162**(2): 257-264.
- 622 **Parachnowitsch AL, Raguso RA, Kessler A. 2012.** Phenotypic selection to increase  
623 floral scent emission, but not flower size or colour in bee-pollinated *Penstemon*  
624 *digitalis*. *New Phytologist* **195**(3): 667-675.
- 625 **R Core Team 2017.** R: A language and environment for statistical computing.  
626 Vienna, Austria: R Foundation for Statistical Computing; 2017: ISBN3-900051-  
627 07-0 <https://www.R-project.org>.
- 628 **Raguso RA, Willis MA. 2005.** Synergy between visual and olfactory cues in nectar  
629 feeding by wild hawkmoths, *Manduca sexta*. *Animal Behaviour* **69**: 407-418.
- 630 **Ramos SE, Schiestl FP. 2019.** Rapid plant evolution driven by the interaction of  
631 pollination and herbivory. *Science* **364**(6436): 193-196.
- 632 **Reid JM. 2012.** Predicting evolutionary responses to selection on polyandry in the  
633 wild: additive genetic covariances with female extra-pair reproduction.  
634 *Proceedings of the Royal Society B Biological Sciences* **279**(1747): 4652.
- 635 **Sandring S, Ågren J. 2009.** Pollinator-mediated selection on floral display and  
636 flowering time in the perennial herb *Arabidopsis lyrata*. *Evolution* **63**(5): 1292-1300.
- 637 **Schiestl FP. 2015.** Ecology and evolution of floral volatile-mediated information  
638 transfer in plants. *New Phytologist* **206**(2): 571-577.
- 639 **Schiestl FP, Huber FK, Gomez JM. 2010.** Phenotypic selection on floral scent:  
640 trade-off between attraction and deterrence? *Evol Ecol* DOI **10.1007/s10682-010-**  
641 **9409-y**.
- 642 **Schiestl FP, Johnson SD. 2013.** Pollinator-mediated evolution of floral signals.  
643 *Trends in Ecology & Evolution* **28**(5): 307-315.
- 644 **Sletvold N, Ågren J. 2010.** Pollinator-mediated selection on floral display and spur  
645 length in the orchid *Gymnadenia conopsea*. *International Journal of Plant Sciences*  
646 **171**(9): 999-1009.

- 647 **Teplitsky C, Tarka M, Møller AP, Nakagawa S, Balbontín J, Burke TA,**  
648 **Doutrelant C, Gregoire A, Hansson B, Hasselquist D. 2014.** Assessing  
649 Multivariate Constraints to Evolution across Ten Long-Term Avian Studies. *PLoS*  
650 *One* **9**(3): e90444.
- 651 **Van Noordwijk AJ, de Jong G. 1986.** Acquisition and allocation of resources: their  
652 influence on variation in life history tactics. *The American Naturalist* **128**(1): 137-  
653 142.
- 654 **Vanhoenacker D, Aring, Gren J, Ehrlén J. 2013.** Non-linear relationship between  
655 intensity of plant-animal interactions and selection strength. *Ecology Letters* **16**(2):  
656 198-205.
- 657 **Williams PH, Hill CB. 1986.** Rapid-cycling populations of Brassica. *Science*  
658 **232**(4756): 1385-1389.
- 659 **Zu P, Blanckenhorn WU, Schiestl FP. 2016.** Heritability of floral volatiles and  
660 pleiotropic responses to artificial selection in Brassica rapa. *New Phytologist*  
661 **209**(3): 1208-1219.
- 662 **Zu P, Schiestl FP. 2017.** The effects of becoming taller: direct and pleiotropic effects  
663 of artificial selection on plant height in Brassica rapa. *The Plant Journal* **89**(5):  
664 1009-1019.
- 665
- 666

667 **Figure Legends**

668 **Figure 1.** Predicted and observed responses of various traits to artificial- and  
669 pollinator-selection (for full names of traits see Table 1). For a scaled-up version of  
670 hoverfly group see Fig. S2. The shapes of violin plots indicate the distributions of the  
671 predicted values. Black dots are the observed changes. Solid-line violin plots indicate  
672 prediction of significant evolutionary change with large confidence (95% HPD  
673 interval not overlapping with zero), whereas red and dashed-line violin plots indicate  
674 prediction of no changes (95% HPD largely overlapping with zero). Violin plots are  
675 filled when the observed changes fall within 95% HPD of predicted changes, whereas  
676 those without filling indicate the observed changes fall outside of the 95% HPD of  
677 predicted changes. Both predicted and observed changes were scaled by the  
678 phenotypic standard deviation of the trait. Sample sizes artificial selection: plant  
679 height: 600; flower size traits (PW, PL, FD): 581; volatiles: 579. Sample sizes  
680 pollinator selection: plant height: 524, flower traits: 525, volatiles: 414.

681 **Figure 2.** Comparison of the size and orientation of the major and five first  
682 eigenvectors (PCs) of the **G**-matrices in the artificial selection experiment. **a)**  
683 Distribution of the eigenvalues (size) of each PC of the three **G**-matrices in the  
684 control (grey), tall (red), and short (blue) artificial selection experiments. The scale of  
685 the y-axis is on the left for PC1 and on the right for PC2-5. **b)** Contribution of PC1 to  
686 the total variation in the 16 traits, measured as the size of PC1 relative to the sum of  
687 all PCs. **c)** Angle of the first and second PC with the first trait axis (height) in degree.  
688 In all cases, variation of all variables stems from the posterior distribution of each **G**-  
689 matrix estimated with MCMCglmm (see Methods and Supporting information).

690 **Table 1. Observed and predicted (total, direct and indirect) changes of traits during nine-generation selection by (A)**  
 691 **bumblebees and (B) hoverflies.** Values were scaled by the phenotypic standard deviation of the traits. Total  $\Delta z$ , the predicted  
 692 responses from the full **G**-matrix; direct  $\Delta z$ , direct responses from only genetic variance (**G0**-matrix); indirect  $\Delta z$ , indirect responses  
 693 from only genetic covariance.  $\Delta z$  values are given as posterior mode, the most likely estimate of a posterior distribution. Bold numbers  
 694 indicate that the observed values fall within the 95% HPD of predicted changes; italic numbers indicate that the predicted changes are  
 695 largely overlapping with zero.

| Traits<br>( <i>Abbr.</i> )        | Observed<br>changes | Predicted changes |         |        |               |         |        |                 |         |       |
|-----------------------------------|---------------------|-------------------|---------|--------|---------------|---------|--------|-----------------|---------|-------|
|                                   |                     | <u>Total</u>      |         |        | <u>Direct</u> |         |        | <u>Indirect</u> |         |       |
|                                   |                     | $\Delta z$        | 95% HPD |        | $\Delta z$    | 95% HPD |        | $\Delta z$      | 95% HPD |       |
| <b><i>(A) Bumblebee</i></b>       |                     |                   |         |        |               |         |        |                 |         |       |
| Plant height<br>( <i>Height</i> ) | 1.359               | 8.663             | 5.966   | 10.911 | 7.980         | 5.347   | 10.109 | 0.565           | 0.045   | 1.091 |
| Petal width<br>( <i>PW</i> )      | 0.232               | 1.906             | 0.270   | 3.230  | 0.149         | 0.114   | 0.198  | <b>1.751</b>    | 0.130   | 3.072 |
| Petal length<br>( <i>PL</i> )     | 0.403               | 2.680             | 0.901   | 4.208  | 0.406         | 0.304   | 0.535  | 2.258           | 0.469   | 3.683 |
| Flower diameter<br>( <i>FD</i> )  | 0.241               | 2.071             | 1.132   | 3.617  | -0.131        | -0.192  | -0.095 | 2.559           | 1.286   | 3.840 |



|                                    |        |              |        |       |              |        |        |              |        |       |
|------------------------------------|--------|--------------|--------|-------|--------------|--------|--------|--------------|--------|-------|
| Benzaldehyde<br>(Ben)              | 0.348  | 0.710        | -1.388 | 3.325 | -0.746       | -1.011 | -0.563 | 1.646        | -0.582 | 4.208 |
| Phenylacetaldehyde<br>(PAA)        | 1.781  | <b>2.071</b> | 0.742  | 4.212 | 1.067        | 0.707  | 1.654  | 1.118        | -0.407 | 2.711 |
| Phenylethyl alcohol<br>(PhA)       | 2.878  | <b>3.848</b> | 0.686  | 7.396 | -0.483       | -0.779 | -0.367 | <b>4.321</b> | 1.251  | 8.125 |
| Methyl salicylate<br>(MeS)         | -0.344 | 0.886        | -1.020 | 2.488 | -0.019       | -0.026 | -0.013 | 0.909        | -1.003 | 2.507 |
| Methyl benzoate<br>(MeB)           | 1.031  | <b>2.416</b> | 0.588  | 4.020 | <b>0.989</b> | 0.706  | 1.329  | 1.195        | -0.333 | 2.827 |
| Methyl anthranilate<br>(MeA)       | 1.221  | <b>1.619</b> | 0.299  | 3.730 | -0.354       | -0.504 | -0.224 | <b>2.502</b> | 0.637  | 4.168 |
| Benzyl nitrile<br>(BenN)           | 1.729  | 0.096        | -0.905 | 1.690 | -0.694       | -0.914 | -0.492 | 1.137        | -0.155 | 2.586 |
| 2-Amino benzaldehyde<br>(ABen)     | 1.231  | <b>1.696</b> | 0.357  | 2.930 | 0.276        | 0.152  | 0.360  | <b>1.411</b> | 0.159  | 2.678 |
| Indole<br>(Ind)                    | 1.238  | <b>1.942</b> | 0.876  | 3.691 | 0.604        | 0.419  | 0.846  | <b>1.625</b> | 0.357  | 2.952 |
| $\alpha$ -Farnesene<br>(FAR)       | 0.880  | <b>1.951</b> | 0.624  | 3.231 | -0.124       | -0.173 | -0.099 | <b>2.090</b> | 0.768  | 3.407 |
| Z-(3)-Hexenyl acetate<br>(ZHA)     | 0.102  | 0.999        | -0.490 | 2.617 | -0.131       | -0.174 | -0.094 | 1.139        | -0.336 | 2.773 |
| 1-Butene-4-isothiocyanate<br>(ITC) | 0.665  | 1.002        | -1.821 | 3.940 | -0.606       | -0.968 | -0.395 | 1.726        | -1.303 | 4.587 |
| <b>(B) Hoverfly</b>                |        |              |        |       |              |        |        |              |        |       |
| Plant height<br>(Height)           | -0.295 | 2.022        | 1.318  | 2.571 | 1.964        | 1.316  | 2.488  | 0.021        | -0.261 | 0.290 |

|                                |        |              |        |       |        |        |        |              |        |       |
|--------------------------------|--------|--------------|--------|-------|--------|--------|--------|--------------|--------|-------|
| Petal width<br>(PW)            | 0.118  | <b>0.354</b> | -0.144 | 0.784 | -0.195 | -0.260 | -0.149 | <b>0.668</b> | 0.074  | 1.046 |
| Petal length<br>(PL)           | 0.371  | <b>0.697</b> | 0.246  | 1.145 | 0.094  | 0.071  | 0.124  | <b>0.605</b> | 0.113  | 0.990 |
| Flower diameter<br>(FD)        | 0.213  | 0.711        | 0.406  | 1.107 | 0.299  | 0.216  | 0.437  | <b>0.389</b> | 0.123  | 0.718 |
| Benzaldehyde<br>(Ben)          | 0.618  | -0.096       | -0.645 | 0.480 | -0.322 | -0.436 | -0.243 | <b>0.267</b> | -0.315 | 0.840 |
| Phenylacetaldehyde<br>(PAA)    | 0.408  | 0.152        | -0.325 | 0.497 | -0.358 | -0.555 | -0.237 | <b>0.461</b> | 0.034  | 0.911 |
| Phenylethyl alcohol<br>(PhA)   | 0.465  | <b>0.395</b> | -0.440 | 1.119 | -0.057 | -0.092 | -0.044 | <b>0.372</b> | -0.371 | 1.191 |
| Methyl salicylate<br>(MeS)     | -0.984 | 0.012        | -0.352 | 0.498 | 0.177  | 0.121  | 0.247  | -0.074       | -0.531 | 0.321 |
| Methyl benzoate<br>(MeB)       | 0.764  | -0.001       | -0.409 | 0.424 | -0.157 | -0.210 | -0.112 | 0.032        | -0.250 | 0.592 |
| Methyl anthranilate<br>(MeA)   | 0.320  | -0.057       | -0.487 | 0.324 | -0.517 | -0.736 | -0.328 | <b>0.533</b> | 0.081  | 0.934 |
| Benzyl nitrile<br>(BenN)       | 0.622  | 0.183        | -0.118 | 0.503 | 0.211  | 0.149  | 0.277  | -0.042       | -0.345 | 0.291 |
| 2-Amino benzaldehyde<br>(ABen) | 0.002  | <b>0.233</b> | -0.119 | 0.483 | -0.046 | -0.060 | -0.025 | <b>0.202</b> | -0.078 | 0.527 |
| Indole<br>(Ind)                | 0.080  | 0.462        | 0.093  | 0.764 | 0.253  | 0.175  | 0.354  | <b>0.243</b> | -0.139 | 0.496 |
| $\alpha$ -Farnesene<br>(FAR)   | 0.767  | 0.512        | 0.207  | 0.863 | 0.228  | 0.182  | 0.318  | 0.234        | -0.015 | 0.576 |
| Z-(3)-Hexenyl acetate<br>(ZHA) | -0.773 | -0.036       | -0.438 | 0.292 | -0.286 | -0.378 | -0.204 | 0.162        | -0.139 | 0.600 |

|                                   |       |       |        |       |        |        |        |       |        |       |
|-----------------------------------|-------|-------|--------|-------|--------|--------|--------|-------|--------|-------|
| 1-Butene-4-isothiocyante<br>(ITC) | 0.868 | 0.361 | -0.544 | 0.876 | -0.013 | -0.020 | -0.008 | 0.378 | -0.544 | 0.876 |
|-----------------------------------|-------|-------|--------|-------|--------|--------|--------|-------|--------|-------|

---

696

697 **Table 2. Comparisons of the three G-matrices using random skewers and hierarchical analyses** (see also Table S3, S4). The  
 698 random skewers section reports the mean correlation among response vectors of two G-matrices subject to the same set of 10,000  
 699 random selection vectors. The hierarchical analysis reports the *P*-values to reject the hypotheses of equality, proportionality, or  
 700 common principal components (CPC) in favor of *unrelated* matrices. The *P*-values are obtained by randomization (see Methods).

| Paired G                                                  | Random Skewers   |                      | Hierarchical |         |        |
|-----------------------------------------------------------|------------------|----------------------|--------------|---------|--------|
|                                                           | Mean correlation | <i>P</i> -value      | Equal        | Prop.   | CPC    |
| $\mathbf{G}_{\text{control}} - \mathbf{G}_{\text{tall}}$  | 0.734            | < 0.01 <sup>a</sup>  | < 0.005      | < 0.005 | 0.002  |
| $\mathbf{G}_{\text{control}} - \mathbf{G}_{\text{short}}$ | 0.987            | < 0.002 <sup>b</sup> | 0.23         | 0.23    | 0.32   |
| $\mathbf{G}_{\text{tall}} - \mathbf{G}_{\text{short}}$    | 0.722            | < 0.21 <sup>a</sup>  | 0.19         | 0.19    | < 0.05 |

701 <sup>a</sup>: left tail; <sup>b</sup>: right tail

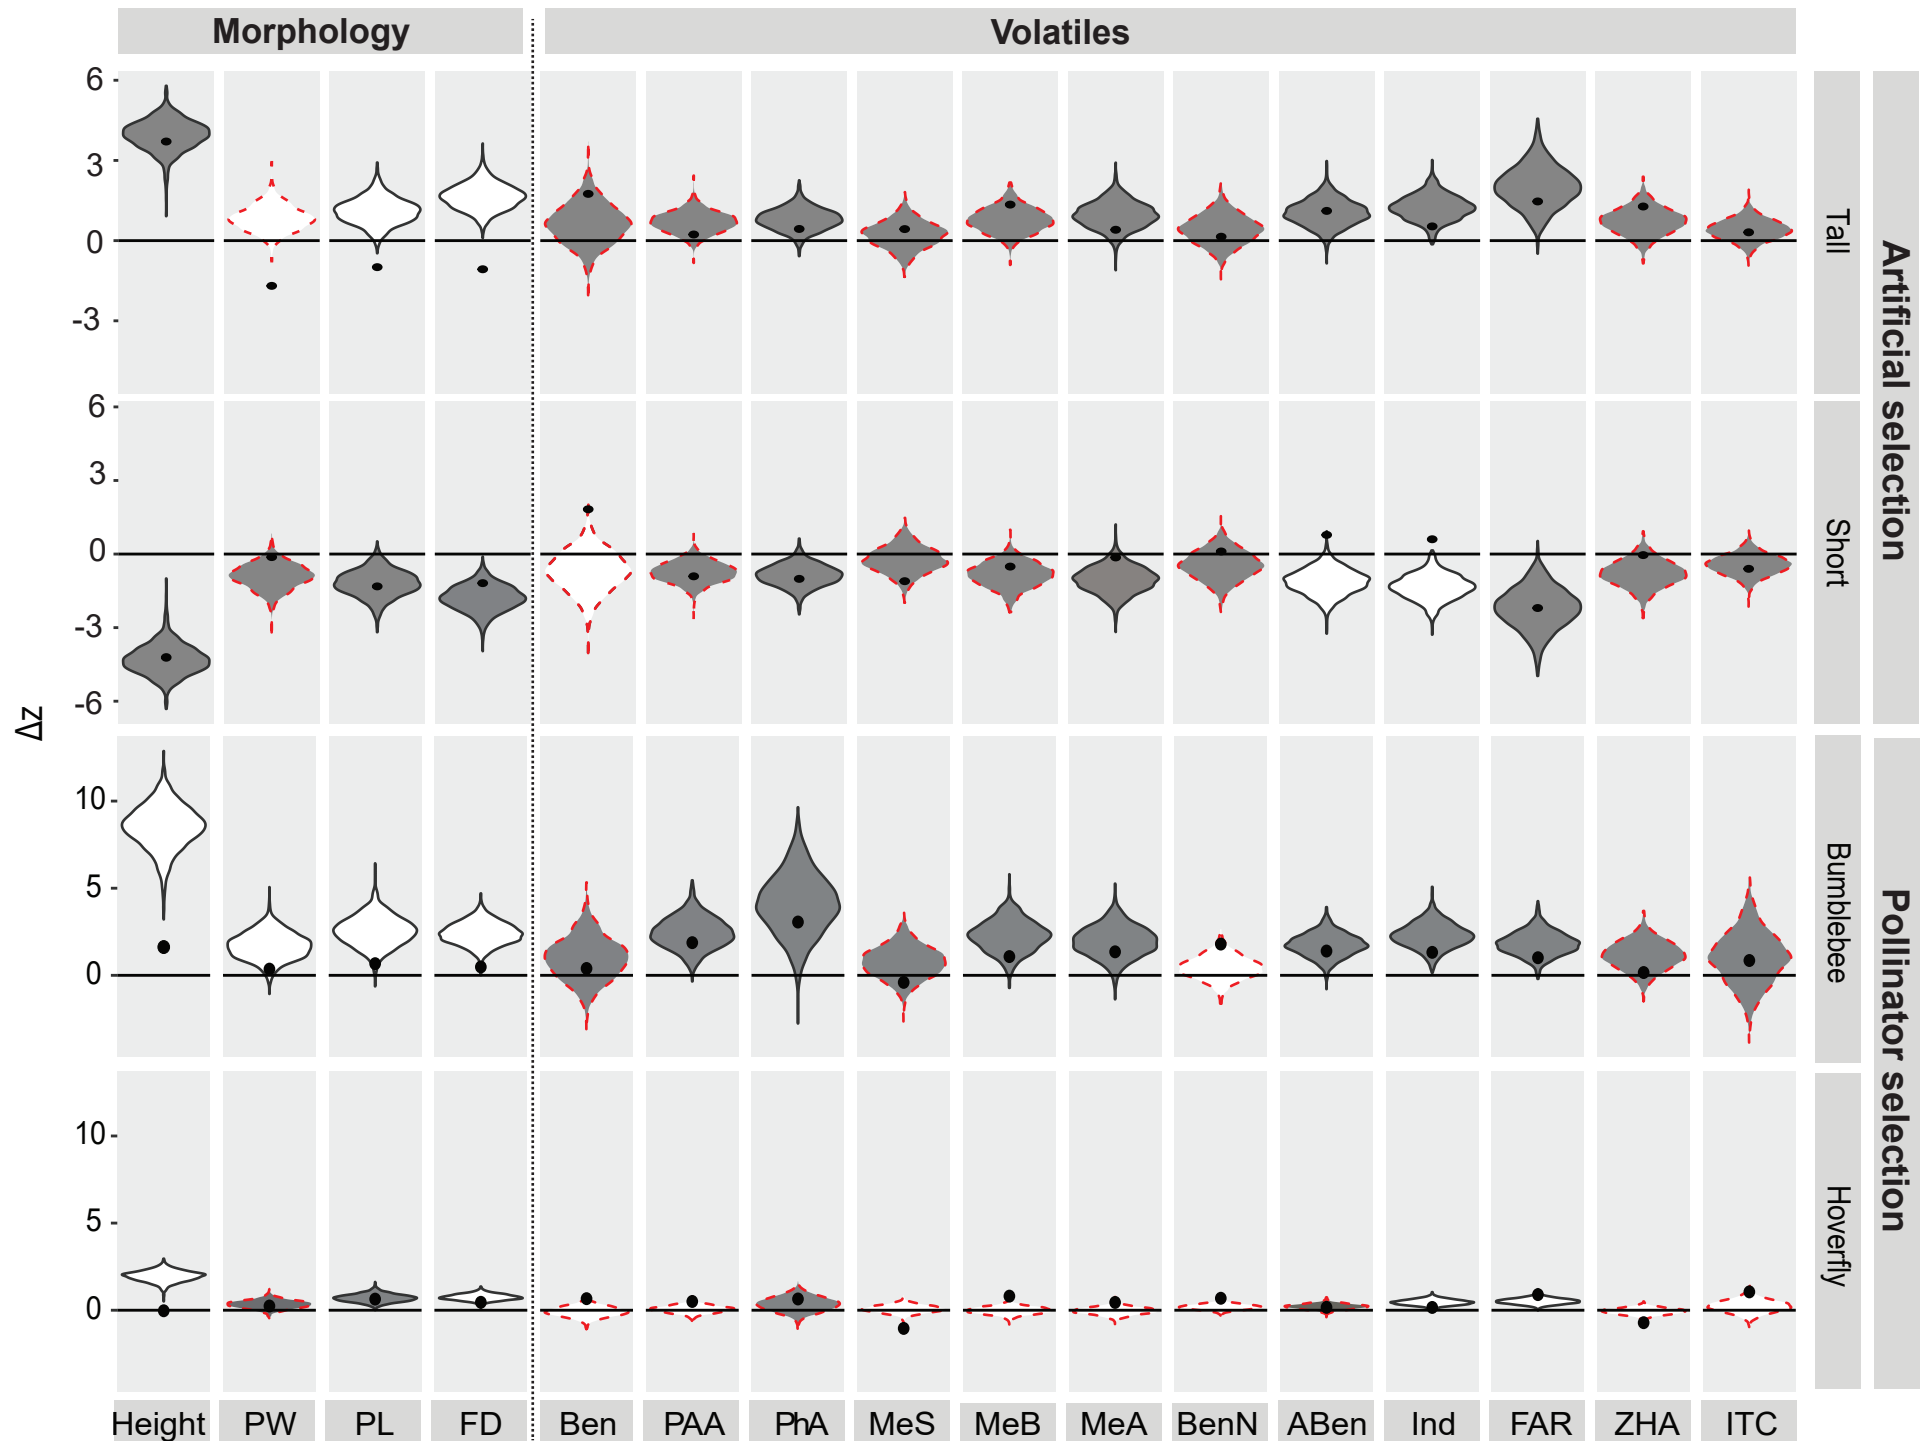

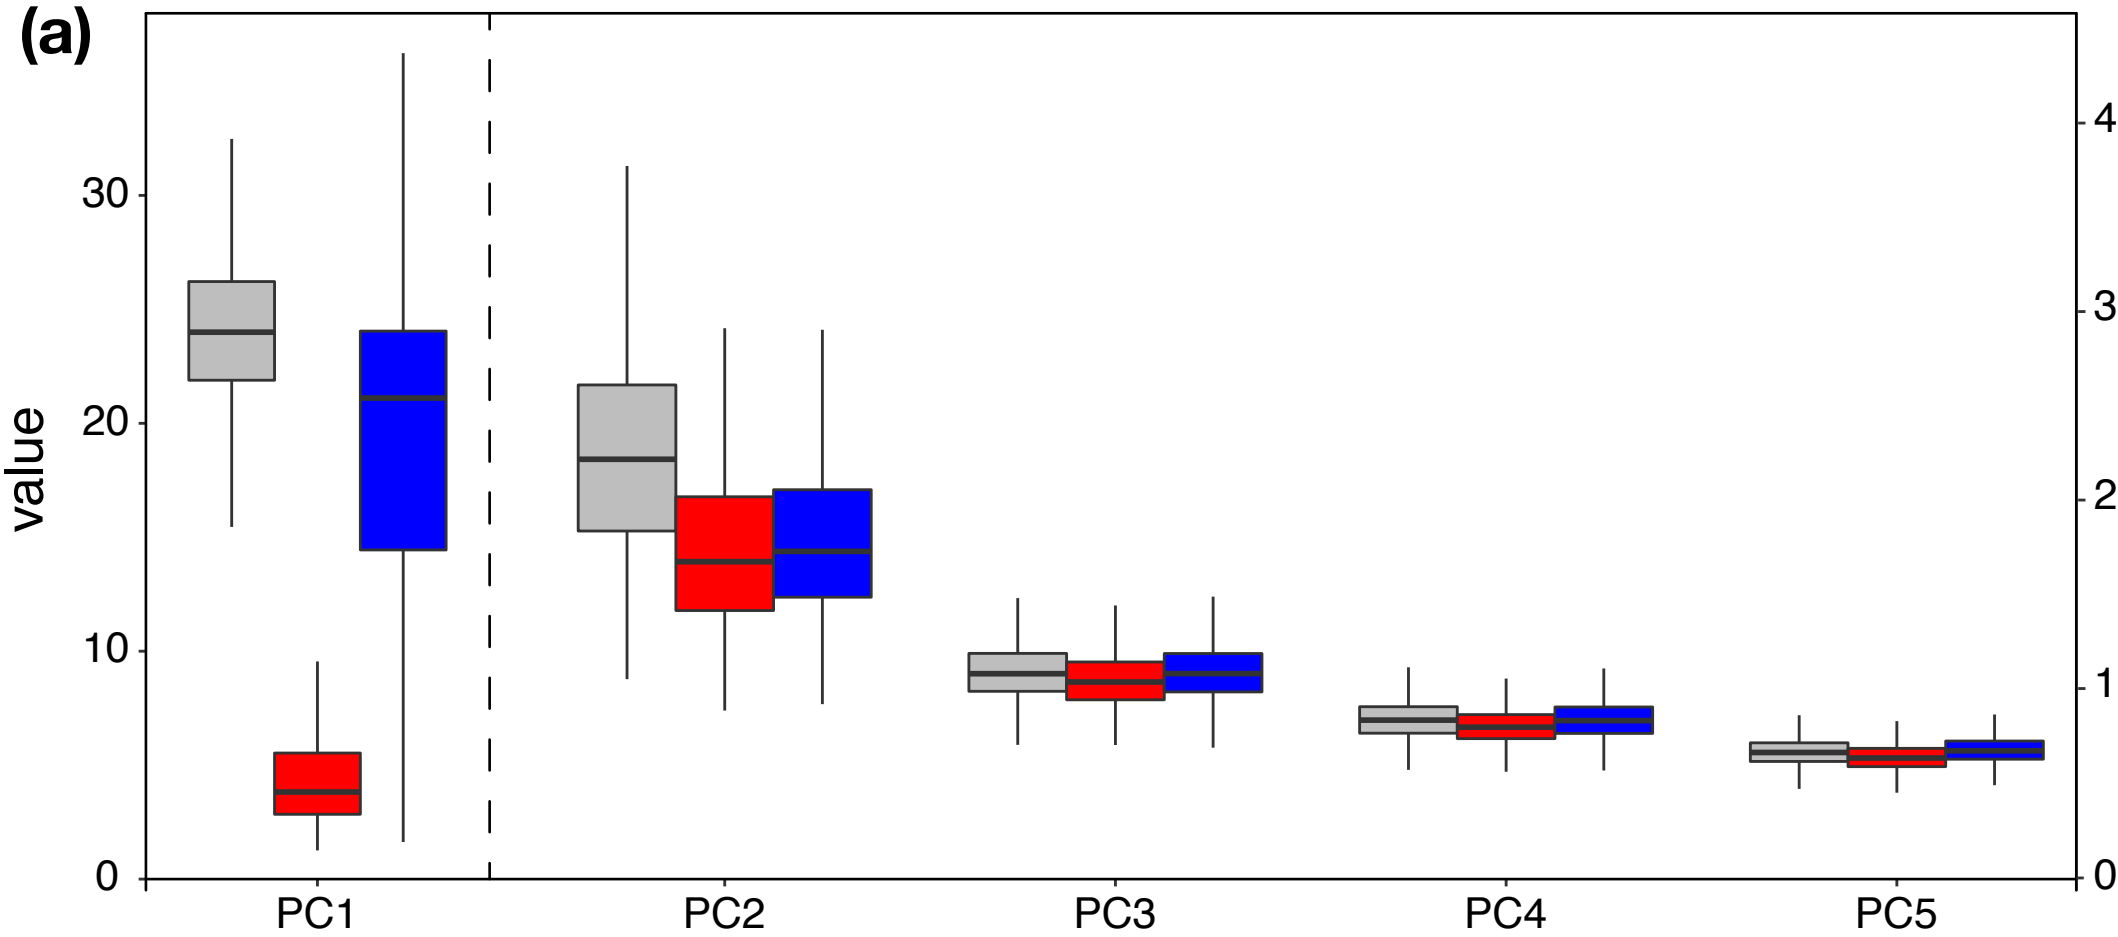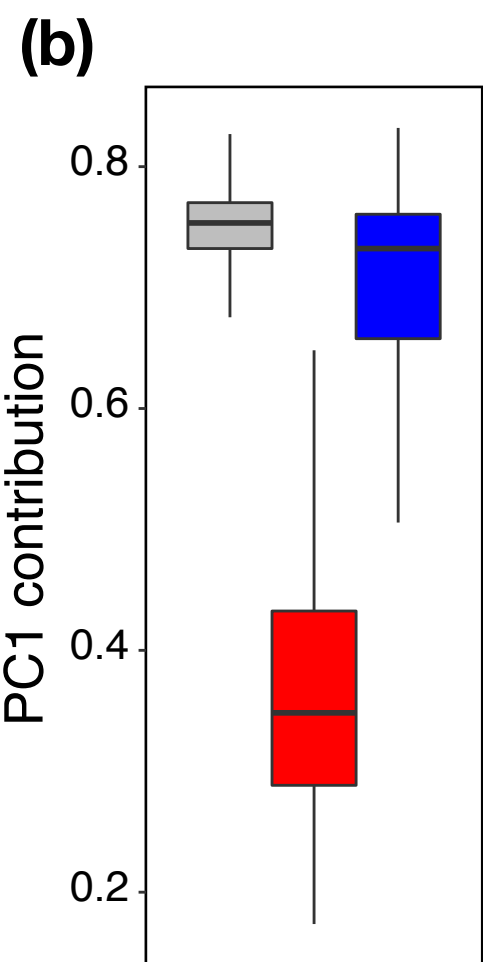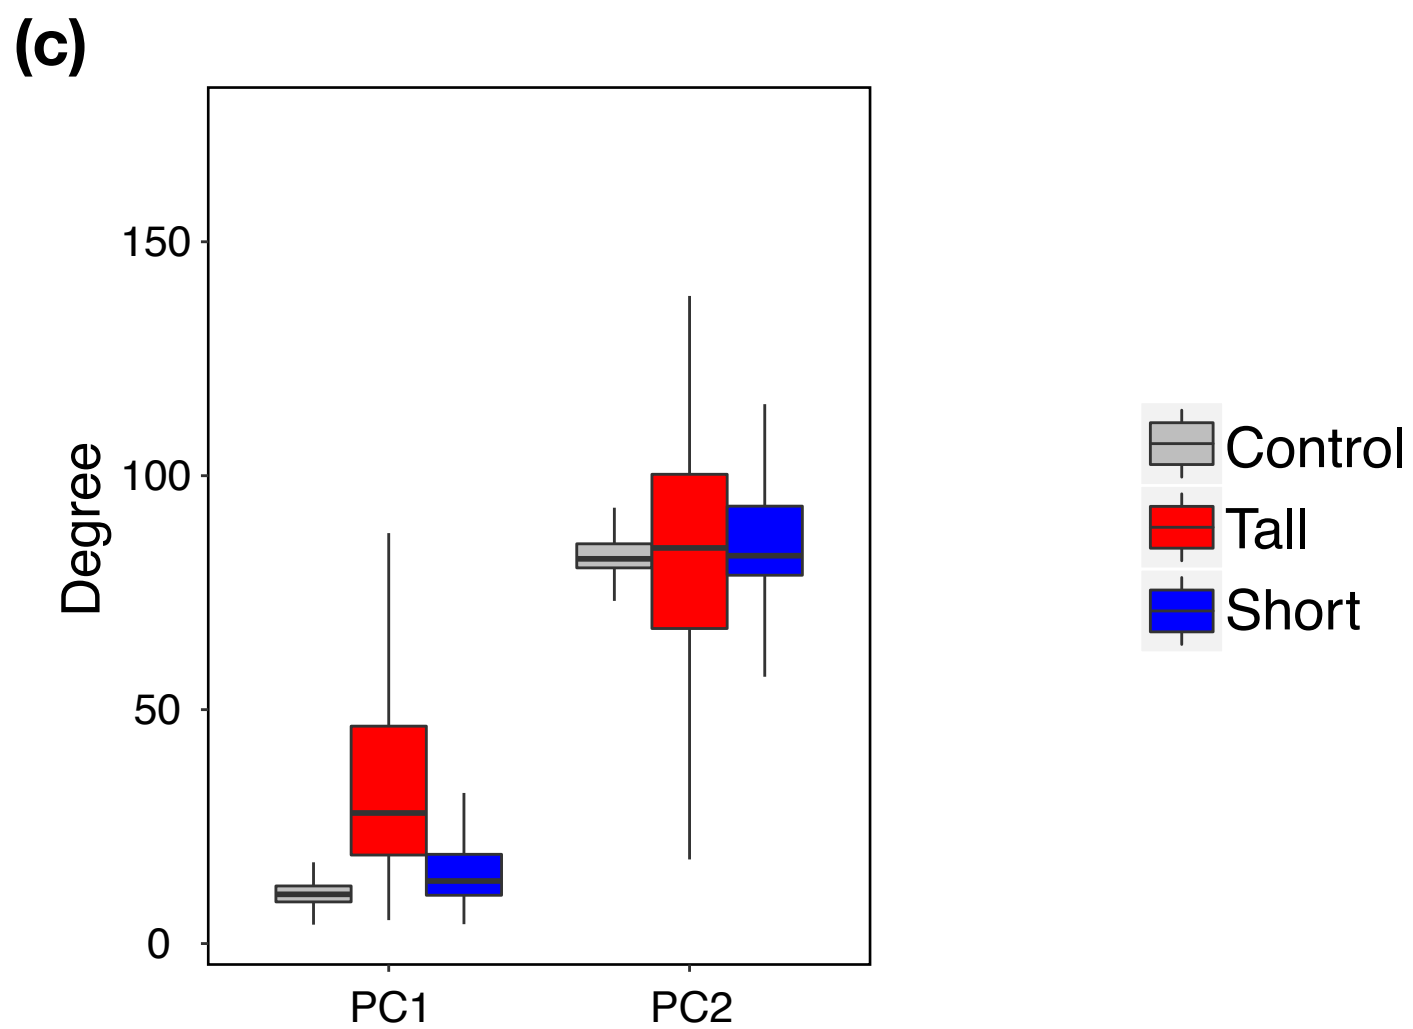

Source: https://www.biorxiv.org/content/10.1101/675413v1.full.pdf
