# Supplementary material for: Floral signals evolve in a predictable way under artificial and pollinator selection in Brassica rapa using a G-matrix
Source: bioRxiv or medRxiv preprint supplement (doi:10.1101/675413), 2020-02-04

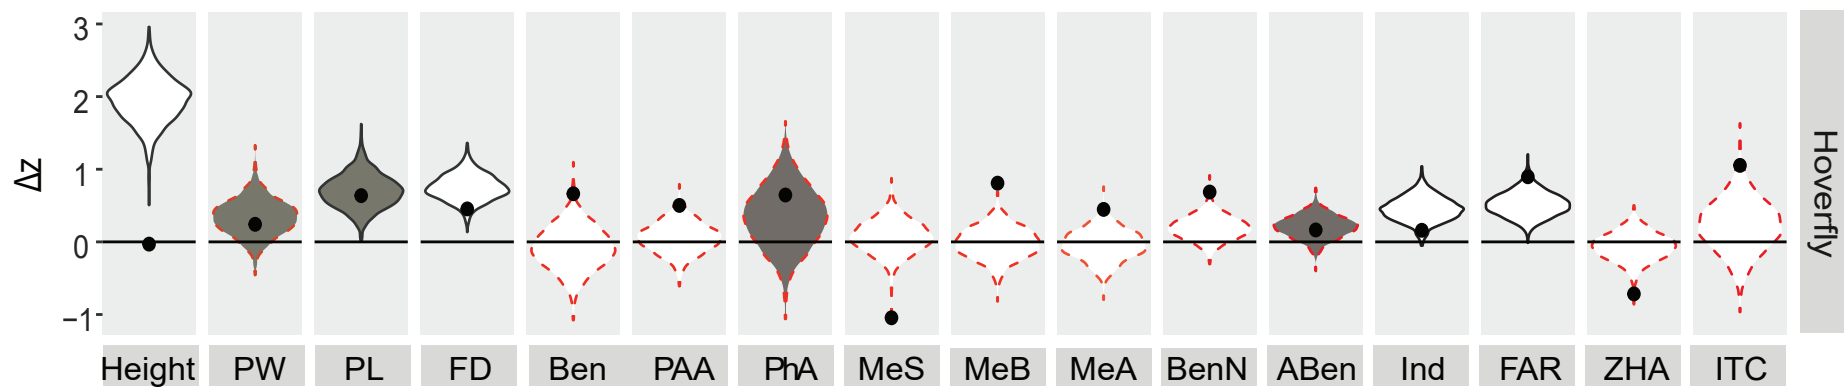

Supplement: Supplementary file [file media-3.pdf]
